# Supplementary material
Source: HighWire-hosted journal article supplement (https://gh.bmj.com/content/4/5/e001755)

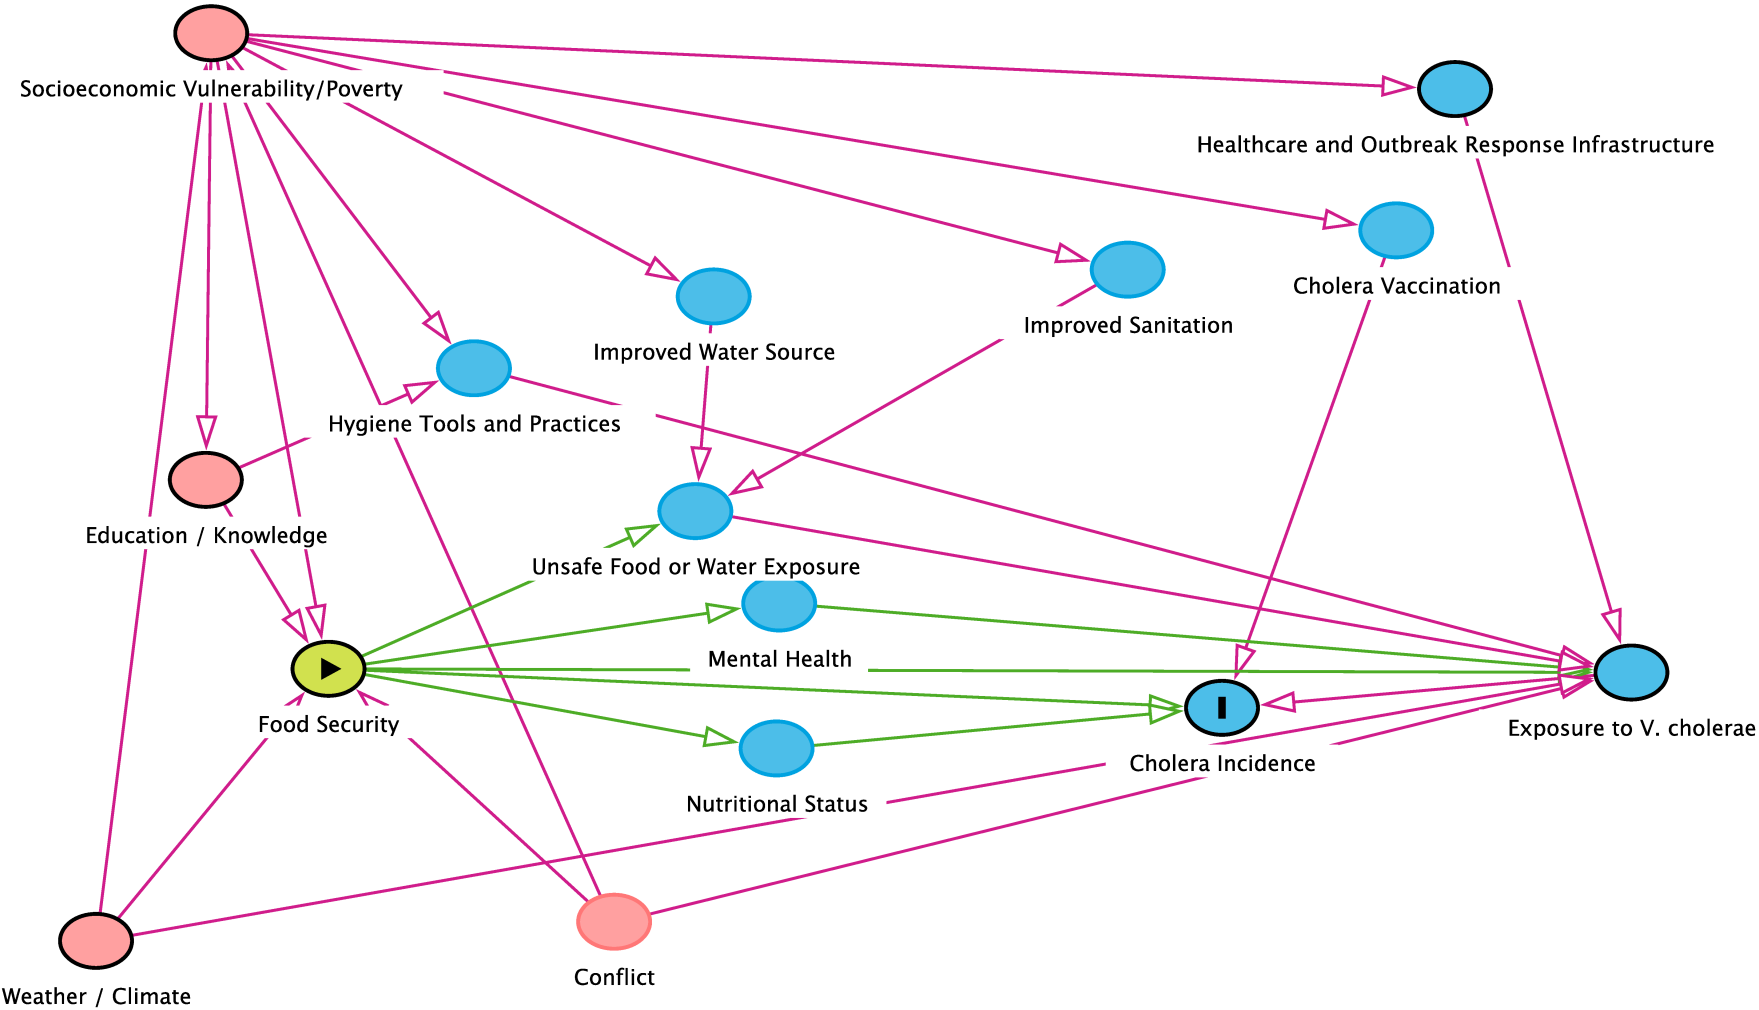

Supplement: inline-supplementary-material-2 [file inline-supplementary-material-2.pdf]
